# Supplementary material for: Cost-effectiveness of enhanced recovery in hip and knee replacement: a systematic review protocol
Source: PubMed Central journal article supplement — BMJ Open. 2018 Mar 14;8(3):e019740. doi: 10.1136/bmjopen-2017-019740 (PMC5857701; doi:10.1136/bmjopen-2017-019740), 2018-03-14
Supplement: bmjopen-2017-019740supp001.pdf [file bmjopen-2017-019740supp001.pdf]

## SUPPLEMENTARY FILE 1: Search strategy

Table 1.1: MEDLINE

|    | Search terms                                                        |
|----|---------------------------------------------------------------------|
| 1  | arthroplasty, replacement, hip/ or arthroplasty, replacement, knee/ |
| 2  | ((knee? or hip) adj (replace\$ or arthroplast*)).ti,ab.             |
| 3  | 1 or 2                                                              |
| 4  | simulation model\$.ti,ab.                                           |
| 5  | markov.ti,ab.                                                       |
| 6  | monte carlo.ti,ab.                                                  |
| 7  | decision tree\$.ti,ab.                                              |
| 8  | decision analy\$.ti,ab.                                             |
| 9  | qaly\$.ti,ab.                                                       |
| 10 | (valu\$ adj2 quality).ti,ab.                                        |
| 11 | utility value\$.ti,ab.                                              |
| 12 | ((disability or quality) adj adjusted).ti,ab.                       |
| 13 | ((life adj2 year\$) or health year equivalent\$).ti,ab.             |
| 14 | (health adj utilit\$).ti,ab.                                        |
| 15 | hui\$1.ti,ab.                                                       |
| 16 | (quality adj3 well\$).ti,ab.                                        |
| 17 | qwb.ti,ab.                                                          |
| 18 | (qald\$ or qale\$ or qtime\$).ti,ab.                                |
| 19 | (well being or wellbeing).tw.                                       |
| 20 | (health adj2 stat\$).tw.                                            |
| 21 | ((adjusted adj2 life) or qaly\$).ti,ab.                             |
| 22 | (daly or qol or hql or hqol or hrqol or hr ql or hrql).tw.          |
| 23 | cost-utility.ti,ab.                                                 |
| 24 | cost-effectiveness.ti,ab.                                           |
| 25 | cost-benefit.ti,ab.                                                 |
| 26 | cost-minimisation.ti,ab.                                            |
| 27 | cost-minimization.ti,ab.                                            |
| 28 | modelling.ti,ab.                                                    |
| 29 | modeling.ti,ab.                                                     |
| 30 | decision model.ti,ab.                                               |
| 31 | QALY.ti,ab.                                                         |
| 32 | quality adjusted life year\$.ti,ab.                                 |
| 33 | cost.ti,ab.                                                         |
| 34 | life year\$.ti,ab.                                                  |
| 35 | incremental cost-effectiveness ratio.ti,ab.                         |
| 36 | (quality adj2 life).ti,ab.                                          |
| 37 | Technology Assessment, Biomedical/                                  |
| 38 | "Costs and Cost Analysis"/                                          |
| 39 | technology assessment\$.ti,ab.                                      |
| 40 | economic evaluation\$.ti,ab.                                        |
| 41 | economic model\$.ti,ab.                                             |
| 42 | discrete event simulat\$.ti,ab.                                     |
| 43 | cost utility.ti,ab.                                                 |
| 44 | cost effectiv\$.ti,ab.                                              |
| 45 | cost benefit.ti,ab.                                                 |
| 46 | cost minimisation.ti,ab.                                            |
| 47 | cost minimization.ti,ab.                                            |
| 48 | ICER\$.ti,ab.                                                       |
| 49 | EQ-5D\$.ti,ab.                                                      |
| 50 | (SF-12 or SF12 or Short Form 12).ti,ab.                             |

## SUPPLEMENTARY FILE 1: Search strategy

|    |                                                                                                                                                                                                                                                                                                                                        |
|----|----------------------------------------------------------------------------------------------------------------------------------------------------------------------------------------------------------------------------------------------------------------------------------------------------------------------------------------|
| 51 | (SF-36 or SF36 or Short Form 36).ti,ab.                                                                                                                                                                                                                                                                                                |
| 52 | (SF-6D or SF6D or Short Form 6D).ti,ab.                                                                                                                                                                                                                                                                                                |
| 53 | rosser index.ti,ab.                                                                                                                                                                                                                                                                                                                    |
| 54 | person trade off.ti,ab.                                                                                                                                                                                                                                                                                                                |
| 55 | standard gamble.ti,ab,kw.                                                                                                                                                                                                                                                                                                              |
| 56 | time trade off.ti,ab,kw.                                                                                                                                                                                                                                                                                                               |
| 57 | Hye.ti,ab,kw.                                                                                                                                                                                                                                                                                                                          |
| 58 | Hyes.ti,ab,kw.                                                                                                                                                                                                                                                                                                                         |
| 59 | Euroqol.ti,ab,kw.                                                                                                                                                                                                                                                                                                                      |
| 60 | 4 or 5 or 6 or 7 or 8 or 9 or 10 or 11 or 12 or 13 or 14 or 15 or 16 or 17 or 18 or 19 or 20 or 21 or 22 or 23 or 24 or 25 or 26 or 27 or 28 or 29 or 30 or 31 or 32 or 33 or 34 or 35 or 36 or 37 or 38 or 39 or 40 or 41 or 42 or 43 or 44 or 45 or 46 or 47 or 48 or 49 or 50 or 51 or 52 or 53 or 54 or 55 or 56 or 57 or 58 or 59 |
| 61 | 3 and 60                                                                                                                                                                                                                                                                                                                               |

Table 1.2: EMBASE

|    | Search terms                                                       |
|----|--------------------------------------------------------------------|
| 1  | hip replacement/ or hip arthroplasty/                              |
| 2  | total knee replacement/ or knee replacement/ or knee arthroplasty/ |
| 3  | ((knee? or hip) adj (replace\$ or arthroplast\$)).ti,ab.           |
| 4  | 1 or 2 or 3                                                        |
| 5  | simulation model\$.ti,ab.                                          |
| 6  | markov.ti,ab.                                                      |
| 7  | monte carlo.ti,ab.                                                 |
| 8  | decision tree\$.ti,ab.                                             |
| 9  | decision analy\$.ti,ab.                                            |
| 10 | qaly\$.ti,ab.                                                      |
| 11 | (valu\$ adj2 quality).ti,ab.                                       |
| 12 | utility value\$.ti,ab.                                             |
| 13 | ((disability or quality) adj adjusted).ti,ab.                      |
| 14 | ((life adj2 year\$) or health year equivalent\$).ti,ab.            |
| 15 | hui\$1.ti,ab.                                                      |
| 16 | (quality adj3 well\$).ti,ab.                                       |
| 17 | qwb.ti,ab.                                                         |
| 18 | (qald\$ or qale\$ or qtime\$).ti,ab.                               |
| 19 | (well being or wellbeing).tw.                                      |
| 20 | (health adj2 stat\$).tw.                                           |
| 21 | ((adjusted adj2 life) or qaly\$).ti,ab.                            |
| 22 | (daly or qol or hql or hqol or hrqol or hr ql or hrql).tw.         |
| 23 | cost-utility.ti,ab.                                                |
| 24 | cost-benefit.ti,ab.                                                |
| 25 | cost-minimisation.ti,ab.                                           |
| 26 | cost-minimization.ti,ab.                                           |
| 27 | modelling.ti,ab.                                                   |
| 28 | modeling.ti,ab.                                                    |
| 29 | QALY.ti,ab.                                                        |
| 30 | quality adjusted life year\$.ti,ab.                                |
| 31 | cost.ti,ab.                                                        |
| 32 | life year\$.ti,ab.                                                 |
| 33 | incremental cost-effectiveness ratio.ti,ab.                        |
| 34 | (quality adj2 life).ti,ab.                                         |

## SUPPLEMENTARY FILE 1: Search strategy

|    |                                                                                                                                                                                                                                                                                                                                         |
|----|-----------------------------------------------------------------------------------------------------------------------------------------------------------------------------------------------------------------------------------------------------------------------------------------------------------------------------------------|
| 35 | decision model\$.ti,ab.                                                                                                                                                                                                                                                                                                                 |
| 36 | cost-effectiv\$.ti,ab.                                                                                                                                                                                                                                                                                                                  |
| 37 | "cost benefit analysis"/                                                                                                                                                                                                                                                                                                                |
| 38 | biomedical technology assessment/                                                                                                                                                                                                                                                                                                       |
| 39 | technology assessment\$.ti,ab.                                                                                                                                                                                                                                                                                                          |
| 40 | economic evaluation\$.ti,ab.                                                                                                                                                                                                                                                                                                            |
| 41 | economic model\$.ti,ab.                                                                                                                                                                                                                                                                                                                 |
| 42 | discrete event simulat\$.ti,ab.                                                                                                                                                                                                                                                                                                         |
| 43 | cost utility.ti,ab.                                                                                                                                                                                                                                                                                                                     |
| 44 | cost effectiv\$.ti,ab.                                                                                                                                                                                                                                                                                                                  |
| 45 | cost benefit.ti,ab.                                                                                                                                                                                                                                                                                                                     |
| 46 | cost minimisation.ti,ab.                                                                                                                                                                                                                                                                                                                |
| 47 | cost minimization.ti,ab.                                                                                                                                                                                                                                                                                                                |
| 48 | ICER\$.ti,ab.                                                                                                                                                                                                                                                                                                                           |
| 49 | (health adj utilit\$.ti,ab.                                                                                                                                                                                                                                                                                                             |
| 50 | EQ-5D\$.ti,ab.                                                                                                                                                                                                                                                                                                                          |
| 51 | (SF-12 or SF12 or Short Form 12).ti,ab.                                                                                                                                                                                                                                                                                                 |
| 52 | (SF-36 or SF36 or Short Form 36).ti,ab.                                                                                                                                                                                                                                                                                                 |
| 53 | (SF-6D or SF6D or Short Form 6D).ti,ab.                                                                                                                                                                                                                                                                                                 |
| 54 | rosser index.ti,ab.                                                                                                                                                                                                                                                                                                                     |
| 55 | person trade off.ti,ab.                                                                                                                                                                                                                                                                                                                 |
| 56 | standard gamble.ti,ab,kw.                                                                                                                                                                                                                                                                                                               |
| 57 | time trade off.ti,ab,kw.                                                                                                                                                                                                                                                                                                                |
| 58 | Hye.ti,ab,kw.                                                                                                                                                                                                                                                                                                                           |
| 59 | Hyes.ti,ab,kw.                                                                                                                                                                                                                                                                                                                          |
| 60 | Euroquol.ti,ab,kw.                                                                                                                                                                                                                                                                                                                      |
| 61 | 5 or 6 or 7 or 8 or 9 or 10 or 11 or 12 or 13 or 14 or 15 or 16 or 17 or 18 or 19 or 20 or 21 or 22 or 23 or 24 or 25 or 26 or 27 or 28 or 29 or 30 or 31 or 32 or 33 or 34 or 35 or 36 or 37 or 38 or 39 or 40 or 41 or 42 or 43 or 44 or 45 or 46 or 47 or 48 or 49 or 50 or 51 or 52 or 53 or 54 or 55 or 56 or 57 or 58 or 59 or 60 |
| 62 | 4 and 61                                                                                                                                                                                                                                                                                                                                |

**Table 1.3: Cochrane library (hip)**

|    | Search terms                                    |
|----|-------------------------------------------------|
| OR | Title, Abstract, Keywords: "Hip arthroplasty"   |
| OR | Title, Abstract, Keywords: "Hip arthroplasties" |
| OR | Title, Abstract, Keywords: "Hip replacement"    |

**Table 1.4: Cochrane library (knee)**

|    | Search terms                                     |
|----|--------------------------------------------------|
| OR | Title, Abstract, Keywords: "Knee arthroplasty"   |
| OR | Title, Abstract, Keywords: "Knee arthroplasties" |
| OR | Title, Abstract, Keywords: "Knee replacement"    |

## SUPPLEMENTARY FILE 1: Search strategy

Table 1.5: EconLit

|     | Search terms                                                                                                           |
|-----|------------------------------------------------------------------------------------------------------------------------|
| AND | TI,AB(hip) OR TI,AB(knee)<br>TI,AB(Replace*) OR TI,AB(arthroplasty*) OR TI,AB(Replacement) OR<br>TI,AB(arthroplasties) |
