# Supplementary material for: Cost-effectiveness of enhanced recovery in hip and knee replacement: a systematic review protocol
Source: PubMed Central journal article supplement — BMJ Open. 2018 Mar 14;8(3):e019740. doi: 10.1136/bmjopen-2017-019740 (PMC5857701; doi:10.1136/bmjopen-2017-019740), 2018-03-14
Supplement: bmjopen-2017-019740supp002.pdf [file bmjopen-2017-019740supp002.pdf]

**SUPPLEMENTARY FILE 2: Data extraction pro-forma**

|                                                                                                                                                       |
|-------------------------------------------------------------------------------------------------------------------------------------------------------|
| <b>Reviewer:</b>                                                                                                                                      |
| <b>Date form completed:</b>                                                                                                                           |
| <b>Title:</b>                                                                                                                                         |
| <b>Author(s):</b>                                                                                                                                     |
| <b>Year Published:</b>                                                                                                                                |
| <b>Citation (incl. doi):</b>                                                                                                                          |
| <b>Type of study:</b> Trial-based EE <input type="checkbox"/> Model-based EE <input type="checkbox"/> Non-EE modelling study <input type="checkbox"/> |

| <b>Economic evaluation details (if applicable)</b>                           | <b>N/A <input type="checkbox"/></b>                        | <b>Location in text</b><br>(page/figure/table/other) |
|------------------------------------------------------------------------------|------------------------------------------------------------|------------------------------------------------------|
| <b>Objective/decision problem:</b>                                           |                                                            |                                                      |
| <b>Patient population characteristics</b> ( <i>describe</i> ):               |                                                            |                                                      |
| <b>Location</b> ( <i>country/city</i> ):                                     |                                                            |                                                      |
| <b>Setting</b> ( <i>describe</i> ):                                          |                                                            |                                                      |
| <b>Economic study design:</b>                                                |                                                            |                                                      |
| CEA                                                                          | <input type="checkbox"/>                                   | CBA <input type="checkbox"/>                         |
| CUA                                                                          | <input type="checkbox"/>                                   | CMA <input type="checkbox"/>                         |
| CCA                                                                          | <input type="checkbox"/>                                   | Cost(s) only <input type="checkbox"/>                |
| Health outcomes(s) only                                                      | <input type="checkbox"/>                                   |                                                      |
| <b>Perspective of analysis:</b>                                              |                                                            |                                                      |
| Societal                                                                     | <input type="checkbox"/>                                   | Individual clinician <input type="checkbox"/>        |
| Patient and patient family                                                   | <input type="checkbox"/>                                   | Insurer/third party payer <input type="checkbox"/>   |
| Healthcare system                                                            | <input type="checkbox"/>                                   | Other: <input type="checkbox"/>                      |
| Healthcare provider                                                          | <input type="checkbox"/>                                   |                                                      |
| <b>Primary costs/consequences/outcome measure(s)</b> ( <i>please list</i> ): |                                                            |                                                      |
| <b>Strategies/comparators:</b>                                               |                                                            |                                                      |
| <b>Time horizon of analysis:</b>                                             |                                                            |                                                      |
| <b>Was discounting used?</b> ( <i>state annual or otherwise</i> )            |                                                            |                                                      |
|                                                                              | Discount rate for costs: .....                             |                                                      |
|                                                                              | Discount rate for health outcomes: .....                   |                                                      |
|                                                                              | No Discounting <input type="checkbox"/>                    |                                                      |
|                                                                              | N/A (no information/not relevant) <input type="checkbox"/> |                                                      |

**SUPPLEMENTARY FILE 2: Data extraction pro-forma**

| <b>Modelling details (if applicable)</b> N/A <input type="checkbox"/>                |                                                                                                                                                                                                                                                                                                                                                                                                                                                                                                                                                                                                                                                                                   | <b>Location in text</b><br>(page/figure/table/other)                                    |
|--------------------------------------------------------------------------------------|-----------------------------------------------------------------------------------------------------------------------------------------------------------------------------------------------------------------------------------------------------------------------------------------------------------------------------------------------------------------------------------------------------------------------------------------------------------------------------------------------------------------------------------------------------------------------------------------------------------------------------------------------------------------------------------|-----------------------------------------------------------------------------------------|
| [Adapted from Philips 2006 and Vemer 2016 (AdViSHE) checklists]                      |                                                                                                                                                                                                                                                                                                                                                                                                                                                                                                                                                                                                                                                                                   |                                                                                         |
| <b>Model type</b>                                                                    | Cohort-based decision tree (DT) <input type="checkbox"/><br>Cohort-based State Transition model (MM) <input type="checkbox"/><br>Individual patient-level DT <input type="checkbox"/><br>Individual patient-level MM <input type="checkbox"/><br>Discrete event simulation <input type="checkbox"/><br>Agent-based model <input type="checkbox"/><br>System dynamics model <input type="checkbox"/><br>Other:                                                                                                                                                                                                                                                                     |                                                                                         |
| <b>Rationale for model type:</b>                                                     | Yes <input type="checkbox"/> If Yes please specify:<br>No <input type="checkbox"/>                                                                                                                                                                                                                                                                                                                                                                                                                                                                                                                                                                                                |                                                                                         |
| <b>Model structure</b> ( <i>paste structure</i> ):                                   |                                                                                                                                                                                                                                                                                                                                                                                                                                                                                                                                                                                                                                                                                   |                                                                                         |
| <b>Rationale for model structure:</b>                                                | Yes <input type="checkbox"/> If Yes please specify:<br>No <input type="checkbox"/>                                                                                                                                                                                                                                                                                                                                                                                                                                                                                                                                                                                                |                                                                                         |
| <b>Structural assumptions, incl. cycle length</b> ( <i>describe</i> ):               |                                                                                                                                                                                                                                                                                                                                                                                                                                                                                                                                                                                                                                                                                   |                                                                                         |
| <b>Have experts been asked to judge the appropriateness of the model?</b>            | Yes <input type="checkbox"/><br>No <input type="checkbox"/>                                                                                                                                                                                                                                                                                                                                                                                                                                                                                                                                                                                                                       | If Yes please specify:<br>1. Who:<br>2. Why they are experts:<br>3. Level of agreement: |
| <b>Has the model been compared with other models found in the literature?</b>        | Yes <input type="checkbox"/><br>No <input type="checkbox"/>                                                                                                                                                                                                                                                                                                                                                                                                                                                                                                                                                                                                                       | If Yes please provide reference/citation:                                               |
| <b>Was patient heterogeneity modelled?</b>                                           | Yes <input type="checkbox"/><br>No <input type="checkbox"/>                                                                                                                                                                                                                                                                                                                                                                                                                                                                                                                                                                                                                       | If Yes please specify:                                                                  |
| <b>Source of data for clinical effect sizes, adverse events &amp; complications:</b> | 1 Meta-analysis of RCTs with direct comparison between comparator therapies, measuring final outcomes. <input type="checkbox"/><br>2 Single RCT with direct comparison between comparator therapies, measuring final outcomes <input type="checkbox"/><br>3 Meta-analysis of RCTs with direct comparison between comparator therapies, measuring surrogate outcomes <input type="checkbox"/><br>Meta-analysis of placebo-controlled RCTs with similar trial populations, measuring final outcomes for each individual therapy <input type="checkbox"/><br>4 Single RCT with direct comparison between comparator therapies, measuring surrogate outcomes <input type="checkbox"/> |                                                                                         |

**SUPPLEMENTARY FILE 2: Data extraction pro-forma**

| Modelling details (if applicable)                                                                                                                                      | N/A <input type="checkbox"/> | Location in text<br><i>(page/figure/table/other)</i> |
|------------------------------------------------------------------------------------------------------------------------------------------------------------------------|------------------------------|------------------------------------------------------|
| [Adapted from Philips 2006 and Vemer 2016 (AdViSHE) checklists]                                                                                                        |                              |                                                      |
| Single placebo-controlled RCTs with similar trial populations, measuring final outcomes for each individual therapy                                                    | <input type="checkbox"/>     |                                                      |
| <b>5</b> Meta-analysis of placebo-controlled RCTs with similar trial populations, measuring surrogate outcomes                                                         | <input type="checkbox"/>     |                                                      |
| <b>6</b> Single placebo-controlled RCTs with similar trial populations, measuring surrogate outcomes for each individual therapy                                       | <input type="checkbox"/>     |                                                      |
| <b>7</b> Case-control or cohort studies                                                                                                                                | <input type="checkbox"/>     |                                                      |
| <b>8</b> Non-analytic studies, for example, case reports, case series                                                                                                  | <input type="checkbox"/>     |                                                      |
| <b>9</b> Expert opinion                                                                                                                                                | <input type="checkbox"/>     |                                                      |
| <b>0</b> Not stated                                                                                                                                                    | <input type="checkbox"/>     |                                                      |
| Other:                                                                                                                                                                 | <input type="checkbox"/>     |                                                      |
| Specify relevant data sources:                                                                                                                                         |                              |                                                      |
| More than 1 data source per parameter?                                                                                                                                 |                              |                                                      |
| Reasons for excluding data sources?                                                                                                                                    |                              |                                                      |
| Evidence synthesis performed?                                                                                                                                          |                              |                                                      |
| Calibration?                                                                                                                                                           |                              |                                                      |
| <b>Source of baseline clinical data:</b>                                                                                                                               |                              |                                                      |
| <b>1</b> Case series or analysis of reliable administrative databases specifically conducted for the study covering patients solely from the jurisdiction of interest. | <input type="checkbox"/>     |                                                      |
| <b>2</b> Recent case series or analysis of reliable administrative databases covering patients solely from the jurisdiction of interest.                               | <input type="checkbox"/>     |                                                      |
| <b>3</b> Recent case series or analysis of reliable administrative databases covering patients solely from another jurisdiction.                                       | <input type="checkbox"/>     |                                                      |
| <b>4</b> Old case series or analysis of reliable administrative databases. Estimates from RCTs                                                                         | <input type="checkbox"/>     |                                                      |
| <b>5</b> Estimates from previously published economic analyses: unsourced                                                                                              | <input type="checkbox"/>     |                                                      |
| <b>6</b> Expert opinion                                                                                                                                                | <input type="checkbox"/>     |                                                      |
| <b>0</b> Not stated                                                                                                                                                    | <input type="checkbox"/>     |                                                      |
| Other:                                                                                                                                                                 | <input type="checkbox"/>     |                                                      |
| Specify relevant data sources:                                                                                                                                         |                              |                                                      |
| More than 1 data source per parameter?                                                                                                                                 |                              |                                                      |

**SUPPLEMENTARY FILE 2: Data extraction pro-forma**

| <b>Modelling details (if applicable)</b>                                                                            | <b>N/A</b> <input type="checkbox"/>                                                                                                                                        | <b>Location in text</b><br><i>(page/figure/table/other)</i> |
|---------------------------------------------------------------------------------------------------------------------|----------------------------------------------------------------------------------------------------------------------------------------------------------------------------|-------------------------------------------------------------|
| [Adapted from Philips 2006 and Vemer 2016 (AdViSHE) checklists]                                                     |                                                                                                                                                                            |                                                             |
|                                                                                                                     | Reasons for excluding data sources?<br>Evidence synthesis performed?<br>Calibration?                                                                                       |                                                             |
| <b>Source of data for duration of primary effect (i.e. after end of follow-up of source of primary effect size)</b> | <b>1</b> Analysis of reliable administrative databases specifically conducted for the study covering patients solely from the jurisdiction of interest                     | <input type="checkbox"/>                                    |
|                                                                                                                     | <b>2</b> Recent analysis of reliable administrative databases covering patients solely from the jurisdiction of interest                                                   | <input type="checkbox"/>                                    |
|                                                                                                                     | <b>3</b> Recent analysis of reliable administrative databases covering patients solely from another jurisdiction                                                           | <input type="checkbox"/>                                    |
|                                                                                                                     | <b>4</b> Old analysis of reliable administrative databases.                                                                                                                | <input type="checkbox"/>                                    |
|                                                                                                                     | <b>5</b> Estimates from previously published economic analyses: unsourced                                                                                                  | <input type="checkbox"/>                                    |
|                                                                                                                     | <b>6</b> Expert opinion                                                                                                                                                    | <input type="checkbox"/>                                    |
|                                                                                                                     | <b>0</b> Not stated                                                                                                                                                        | <input type="checkbox"/>                                    |
|                                                                                                                     | Other:<br>Specify relevant data sources:<br>More than 1 data source per parameter?<br>Reasons for excluding data sources?<br>Evidence synthesis performed?<br>Calibration? | <input type="checkbox"/>                                    |
| <b>Source of data for resource use:</b>                                                                             | <b>1</b> Prospective data collection or analysis of reliable administrative data from same jurisdiction for specific study                                                 | <input type="checkbox"/>                                    |
|                                                                                                                     | <b>2</b> Recently published results of prospective data collection or recent analysis of reliable administrative data – same jurisdiction                                  | <input type="checkbox"/>                                    |
|                                                                                                                     | <b>3</b> Unsourced data from previous economic evaluations – same jurisdiction                                                                                             | <input type="checkbox"/>                                    |
|                                                                                                                     | <b>4</b> Recently published results of prospective data collection or recent analysis of reliable administrative data – different jurisdiction                             | <input type="checkbox"/>                                    |
|                                                                                                                     | <b>5</b> Unsourced data from previous economic evaluation – different jurisdiction                                                                                         | <input type="checkbox"/>                                    |
|                                                                                                                     | <b>6</b> Expert opinion                                                                                                                                                    | <input type="checkbox"/>                                    |
|                                                                                                                     | <b>0</b> Not stated                                                                                                                                                        | <input type="checkbox"/>                                    |
|                                                                                                                     | Other:<br>Specify relevant data sources:                                                                                                                                   | <input type="checkbox"/>                                    |

**SUPPLEMENTARY FILE 2: Data extraction pro-forma**

| <b>Modelling details (if applicable)</b>                                                            | N/A <input type="checkbox"/>                                                                                                                                                                                                                                                                                                                                                                                                                                                                                                                                                                                                                                                | <b>Location in text</b><br><i>(page/figure/table/other)</i>                                                |
|-----------------------------------------------------------------------------------------------------|-----------------------------------------------------------------------------------------------------------------------------------------------------------------------------------------------------------------------------------------------------------------------------------------------------------------------------------------------------------------------------------------------------------------------------------------------------------------------------------------------------------------------------------------------------------------------------------------------------------------------------------------------------------------------------|------------------------------------------------------------------------------------------------------------|
| [Adapted from Philips 2006 and Vemer 2016 (AdViSHE) checklists]                                     |                                                                                                                                                                                                                                                                                                                                                                                                                                                                                                                                                                                                                                                                             |                                                                                                            |
|                                                                                                     | <p>More than 1 data source per parameter?</p> <p>Reasons for excluding data sources?</p> <p>Evidence synthesis performed?</p> <p>Calibration?</p>                                                                                                                                                                                                                                                                                                                                                                                                                                                                                                                           |                                                                                                            |
| <b>Are methods for identifying and synthesising input data reported?</b>                            | <p>Yes <input type="checkbox"/></p> <p>No <input type="checkbox"/></p> <p>If Yes please specify:</p>                                                                                                                                                                                                                                                                                                                                                                                                                                                                                                                                                                        |                                                                                                            |
| <b>Were all data sources described and reported?</b>                                                | <p>Yes <input type="checkbox"/></p> <p>No <input type="checkbox"/></p>                                                                                                                                                                                                                                                                                                                                                                                                                                                                                                                                                                                                      |                                                                                                            |
| <b>Were mutually inconsistent data reported in the model?</b>                                       | <p>Yes <input type="checkbox"/></p> <p>No <input type="checkbox"/></p>                                                                                                                                                                                                                                                                                                                                                                                                                                                                                                                                                                                                      | If Yes were the choices justified?                                                                         |
| <b>Model uncertainty</b>                                                                            | <p>Methodological uncertainty <input type="checkbox"/></p> <p>If yes, describe:</p> <p>Structural uncertainty <input type="checkbox"/></p> <p>If yes, describe:</p> <p>Heterogeneity <input type="checkbox"/></p> <p>If yes, list subgroups:</p> <p>Parameter uncertainty <input type="checkbox"/></p> <p>If yes, list method:</p>                                                                                                                                                                                                                                                                                                                                          |                                                                                                            |
| <b>Have experts been asked to judge the appropriateness of the input data?</b>                      | <p>Yes <input type="checkbox"/></p> <p>No <input type="checkbox"/></p>                                                                                                                                                                                                                                                                                                                                                                                                                                                                                                                                                                                                      | <p>If Yes please specify:</p> <p>1. Who:</p> <p>2. Why they are experts:</p> <p>3. Level of agreement:</p> |
| <b>When input parameters are based on regression models, have statistical tests been performed?</b> | <p>Yes <input type="checkbox"/></p> <p>No <input type="checkbox"/></p>                                                                                                                                                                                                                                                                                                                                                                                                                                                                                                                                                                                                      | If Yes please specify tests:                                                                               |
| <b>Model internal validation (mathematical logic and accuracy of coding)</b>                        | <p>Computerised model examined by modelling experts <input type="checkbox"/></p> <p>Model run for specific, extreme sets of parameter values to detect coding errors <input type="checkbox"/></p> <p>Patients tracked through model to determine if its logic is correct <input type="checkbox"/></p> <p>Tested individual sub-modules of the computerised model <input type="checkbox"/></p> <p>Internal validation not reported <input type="checkbox"/></p>                                                                                                                                                                                                              |                                                                                                            |
| <b>Model external validation</b>                                                                    | <p>Model outcomes assessed by experts <input type="checkbox"/></p> <p>Model outcomes compared with the outcomes of other models that address similar problems <input type="checkbox"/></p> <p>Model outcomes compared with the outcomes obtained when using alternative input data <input type="checkbox"/></p> <p>Model outcomes compared with empirical data <input type="checkbox"/></p> <p>Model calibrated against independent data with differences explained and justified <input type="checkbox"/></p> <p>Counterintuitive results from model explained and justified <input type="checkbox"/></p> <p>External validation not reported <input type="checkbox"/></p> |                                                                                                            |
| <b>Other model validation (describe):</b>                                                           |                                                                                                                                                                                                                                                                                                                                                                                                                                                                                                                                                                                                                                                                             |                                                                                                            |

**SUPPLEMENTARY FILE 2: Data extraction pro-forma**

| <b>Data details (all analyses)</b><br>[Adapted from Coyle & Lee 2002, and with additional items] |                                                                                                                         |                          |                         | <b>Location in text</b><br><i>(page/figure/table/other)</i> |
|--------------------------------------------------------------------------------------------------|-------------------------------------------------------------------------------------------------------------------------|--------------------------|-------------------------|-------------------------------------------------------------|
| <b>Costs included:</b>                                                                           | Direct medical                                                                                                          | <input type="checkbox"/> | Direct non-medical      | <input type="checkbox"/>                                    |
|                                                                                                  | Direct treatment                                                                                                        | <input type="checkbox"/> | Social care             | <input type="checkbox"/>                                    |
|                                                                                                  | In-patient                                                                                                              | <input type="checkbox"/> | Social benefits         | <input type="checkbox"/>                                    |
|                                                                                                  | Out-patient                                                                                                             | <input type="checkbox"/> | Travel costs            | <input type="checkbox"/>                                    |
|                                                                                                  | Day care                                                                                                                | <input type="checkbox"/> | Caregiver out-of-pocket | <input type="checkbox"/>                                    |
|                                                                                                  | Community healthcare                                                                                                    | <input type="checkbox"/> | Criminal Justice        | <input type="checkbox"/>                                    |
|                                                                                                  | Medication                                                                                                              | <input type="checkbox"/> | Training of staff       | <input type="checkbox"/>                                    |
|                                                                                                  | Side effect costs                                                                                                       | <input type="checkbox"/> |                         |                                                             |
|                                                                                                  | or                                                                                                                      |                          |                         |                                                             |
|                                                                                                  | Staff                                                                                                                   | <input type="checkbox"/> |                         |                                                             |
|                                                                                                  | Medication                                                                                                              | <input type="checkbox"/> |                         |                                                             |
|                                                                                                  | Labs/diagnostic                                                                                                         | <input type="checkbox"/> |                         |                                                             |
|                                                                                                  | Overhead                                                                                                                | <input type="checkbox"/> |                         |                                                             |
|                                                                                                  | Capital equipment                                                                                                       | <input type="checkbox"/> |                         |                                                             |
|                                                                                                  | Real estate                                                                                                             | <input type="checkbox"/> |                         |                                                             |
|                                                                                                  | Other:                                                                                                                  | <input type="checkbox"/> |                         |                                                             |
| <b>Source of data for costs:</b>                                                                 | <b>1</b> Cost calculations based on reliable databases or data sources conducted for specific study – same jurisdiction |                          |                         | <input type="checkbox"/>                                    |
|                                                                                                  | <b>2</b> Recently published cost calculations based on reliable databases or data sources – same jurisdiction           |                          |                         | <input type="checkbox"/>                                    |
|                                                                                                  | <b>3</b> Unsourced data from previous economic evaluation – same jurisdiction                                           |                          |                         | <input type="checkbox"/>                                    |
|                                                                                                  | <b>4</b> Recently published cost calculations based on reliable databases or data sources – different jurisdiction      |                          |                         | <input type="checkbox"/>                                    |
|                                                                                                  | <b>5</b> Unsourced data from previous economic evaluation – different jurisdiction                                      |                          |                         | <input type="checkbox"/>                                    |
|                                                                                                  | <b>6</b> Expert opinion                                                                                                 |                          |                         | <input type="checkbox"/>                                    |
|                                                                                                  | <b>0</b> Not stated                                                                                                     |                          |                         | <input type="checkbox"/>                                    |
|                                                                                                  | Other:                                                                                                                  |                          |                         | <input type="checkbox"/>                                    |
|                                                                                                  | Specify relevant data sources:                                                                                          |                          |                         |                                                             |
|                                                                                                  | More than 1 data source per parameter?                                                                                  |                          |                         |                                                             |
|                                                                                                  | Reasons for excluding data sources?                                                                                     |                          |                         |                                                             |
|                                                                                                  | Evidence synthesis performed?                                                                                           |                          |                         |                                                             |

**SUPPLEMENTARY FILE 2: Data extraction pro-forma**

|                                                           |                                                                                                                                                                                                                                                                                                                                                                                                                                                                                                                                                                                                                                                                                                                                                                                                                                                          |                              |                          |                              |                          |       |                          |                             |                          |     |                          |       |                          |       |                          |      |                          |
|-----------------------------------------------------------|----------------------------------------------------------------------------------------------------------------------------------------------------------------------------------------------------------------------------------------------------------------------------------------------------------------------------------------------------------------------------------------------------------------------------------------------------------------------------------------------------------------------------------------------------------------------------------------------------------------------------------------------------------------------------------------------------------------------------------------------------------------------------------------------------------------------------------------------------------|------------------------------|--------------------------|------------------------------|--------------------------|-------|--------------------------|-----------------------------|--------------------------|-----|--------------------------|-------|--------------------------|-------|--------------------------|------|--------------------------|
| Calibration?                                              |                                                                                                                                                                                                                                                                                                                                                                                                                                                                                                                                                                                                                                                                                                                                                                                                                                                          |                              |                          |                              |                          |       |                          |                             |                          |     |                          |       |                          |       |                          |      |                          |
| <b>Source of data for utilities:</b>                      | <b>1</b> Direct utility assessment for the specific study from a sample either: <input type="checkbox"/> <ul style="list-style-type: none"> <li>(a) of the general population, or</li> <li>(b) with knowledge of the disease(s) of interest, or</li> <li>(c) of patients with the disease(s) of interest</li> </ul>                                                                                                                                                                                                                                                                                                                                                                                                                                                                                                                                      |                              |                          |                              |                          |       |                          |                             |                          |     |                          |       |                          |       |                          |      |                          |
|                                                           | Indirect utility assessment for the specific study from patient sample with disease(s) of interest, using a tool validated for the patient population <input type="checkbox"/>                                                                                                                                                                                                                                                                                                                                                                                                                                                                                                                                                                                                                                                                           |                              |                          |                              |                          |       |                          |                             |                          |     |                          |       |                          |       |                          |      |                          |
|                                                           | <b>2</b> Direct utility assessment from a previous study from a sample either: <input type="checkbox"/> <ul style="list-style-type: none"> <li>(a) of the general population, or</li> <li>(b) with knowledge of the disease(s) of interest, or</li> <li>(c) of patients with the disease(s) of interest</li> </ul>                                                                                                                                                                                                                                                                                                                                                                                                                                                                                                                                       |                              |                          |                              |                          |       |                          |                             |                          |     |                          |       |                          |       |                          |      |                          |
|                                                           | Indirect utility assessment from a previous study from patient sample with disease(s) of interest, using a tool validated for the patient population <input type="checkbox"/>                                                                                                                                                                                                                                                                                                                                                                                                                                                                                                                                                                                                                                                                            |                              |                          |                              |                          |       |                          |                             |                          |     |                          |       |                          |       |                          |      |                          |
|                                                           | <b>3</b> Indirect utility assessment from a patient sample with disease(s) of interest, using a tool <b>not</b> validated for the patient population <input type="checkbox"/>                                                                                                                                                                                                                                                                                                                                                                                                                                                                                                                                                                                                                                                                            |                              |                          |                              |                          |       |                          |                             |                          |     |                          |       |                          |       |                          |      |                          |
|                                                           | Patient preference values obtained from a visual analogue scale <input type="checkbox"/>                                                                                                                                                                                                                                                                                                                                                                                                                                                                                                                                                                                                                                                                                                                                                                 |                              |                          |                              |                          |       |                          |                             |                          |     |                          |       |                          |       |                          |      |                          |
|                                                           | <b>4</b> Delphi panels, expert opinion <input type="checkbox"/>                                                                                                                                                                                                                                                                                                                                                                                                                                                                                                                                                                                                                                                                                                                                                                                          |                              |                          |                              |                          |       |                          |                             |                          |     |                          |       |                          |       |                          |      |                          |
|                                                           | <b>0</b> Not clearly stated <input type="checkbox"/>                                                                                                                                                                                                                                                                                                                                                                                                                                                                                                                                                                                                                                                                                                                                                                                                     |                              |                          |                              |                          |       |                          |                             |                          |     |                          |       |                          |       |                          |      |                          |
|                                                           | Other: <input type="checkbox"/> <ul style="list-style-type: none"> <li>Specify relevant data sources:</li> <li>More than 1 data source per parameter?</li> <li>Reasons for excluding data sources?</li> <li>Evidence synthesis performed?</li> </ul>                                                                                                                                                                                                                                                                                                                                                                                                                                                                                                                                                                                                     |                              |                          |                              |                          |       |                          |                             |                          |     |                          |       |                          |       |                          |      |                          |
|                                                           | Calibration?                                                                                                                                                                                                                                                                                                                                                                                                                                                                                                                                                                                                                                                                                                                                                                                                                                             |                              |                          |                              |                          |       |                          |                             |                          |     |                          |       |                          |       |                          |      |                          |
| <b>Were QOL estimates derived:</b>                        | Yes <input type="checkbox"/><br>No <input type="checkbox"/>                                                                                                                                                                                                                                                                                                                                                                                                                                                                                                                                                                                                                                                                                                                                                                                              |                              |                          |                              |                          |       |                          |                             |                          |     |                          |       |                          |       |                          |      |                          |
| <b>If validated tools were used, which instrument(s):</b> | <table style="width: 100%; border: none;"> <tr> <td style="width: 50%;">Rosser Index</td> <td style="width: 10%; text-align: center;"><input type="checkbox"/></td> <td style="width: 30%;">Health Utilities Index (HUI)</td> <td style="width: 10%; text-align: center;"><input type="checkbox"/></td> </tr> <tr> <td>EQ-5D</td> <td style="text-align: center;"><input type="checkbox"/></td> <td>Quality of Well Being (QWB)</td> <td style="text-align: center;"><input type="checkbox"/></td> </tr> <tr> <td>15D</td> <td style="text-align: center;"><input type="checkbox"/></td> <td>SF-36</td> <td style="text-align: center;"><input type="checkbox"/></td> </tr> <tr> <td>SF-12</td> <td style="text-align: center;"><input type="checkbox"/></td> <td>SF-6</td> <td style="text-align: center;"><input type="checkbox"/></td> </tr> </table> | Rosser Index                 | <input type="checkbox"/> | Health Utilities Index (HUI) | <input type="checkbox"/> | EQ-5D | <input type="checkbox"/> | Quality of Well Being (QWB) | <input type="checkbox"/> | 15D | <input type="checkbox"/> | SF-36 | <input type="checkbox"/> | SF-12 | <input type="checkbox"/> | SF-6 | <input type="checkbox"/> |
| Rosser Index                                              | <input type="checkbox"/>                                                                                                                                                                                                                                                                                                                                                                                                                                                                                                                                                                                                                                                                                                                                                                                                                                 | Health Utilities Index (HUI) | <input type="checkbox"/> |                              |                          |       |                          |                             |                          |     |                          |       |                          |       |                          |      |                          |
| EQ-5D                                                     | <input type="checkbox"/>                                                                                                                                                                                                                                                                                                                                                                                                                                                                                                                                                                                                                                                                                                                                                                                                                                 | Quality of Well Being (QWB)  | <input type="checkbox"/> |                              |                          |       |                          |                             |                          |     |                          |       |                          |       |                          |      |                          |
| 15D                                                       | <input type="checkbox"/>                                                                                                                                                                                                                                                                                                                                                                                                                                                                                                                                                                                                                                                                                                                                                                                                                                 | SF-36                        | <input type="checkbox"/> |                              |                          |       |                          |                             |                          |     |                          |       |                          |       |                          |      |                          |
| SF-12                                                     | <input type="checkbox"/>                                                                                                                                                                                                                                                                                                                                                                                                                                                                                                                                                                                                                                                                                                                                                                                                                                 | SF-6                         | <input type="checkbox"/> |                              |                          |       |                          |                             |                          |     |                          |       |                          |       |                          |      |                          |
| <b>Converted into utilities?</b>                          | Yes <input type="checkbox"/><br>No <input type="checkbox"/><br>If Yes report value set:                                                                                                                                                                                                                                                                                                                                                                                                                                                                                                                                                                                                                                                                                                                                                                  |                              |                          |                              |                          |       |                          |                             |                          |     |                          |       |                          |       |                          |      |                          |
| <b>If direct elicitation was used, which approach(s):</b> | Standard Gamble <input type="checkbox"/><br>VAS/rating scale <input type="checkbox"/><br>Time trade-off <input type="checkbox"/><br>Person trade-off <input type="checkbox"/>                                                                                                                                                                                                                                                                                                                                                                                                                                                                                                                                                                                                                                                                            |                              |                          |                              |                          |       |                          |                             |                          |     |                          |       |                          |       |                          |      |                          |

**SUPPLEMENTARY FILE 2: Data extraction pro-forma**

|                         |     |                          |
|-------------------------|-----|--------------------------|
| <b>Utility values</b>   | Yes | <input type="checkbox"/> |
| <b>combined with</b>    | No  | <input type="checkbox"/> |
| <b>survival to form</b> |     |                          |
| <b>QALYs?</b>           |     |                          |

| <b>Study results</b>                          |                                                                                 | <b>Location in text</b><br>(page/figure/table/other) |
|-----------------------------------------------|---------------------------------------------------------------------------------|------------------------------------------------------|
| <b>Currency and cost year</b>                 |                                                                                 |                                                      |
| <b>Cost-effectiveness results (e.g. ICER)</b> | Point estimate:<br>Probabilistic results (probability of being cost-effective): |                                                      |
| <b>Value of Information</b>                   | Give details:<br>Not reported: <input type="checkbox"/>                         |                                                      |
| <b>Study conclusions</b>                      |                                                                                 |                                                      |

| <b>Quality and risk of bias for economic evaluations (if applicable)</b> |                                        | <b>N/A</b> <input type="checkbox"/>                                                           |
|--------------------------------------------------------------------------|----------------------------------------|-----------------------------------------------------------------------------------------------|
| <b>Checklists completed:</b>                                             | CHEC (all EE) <input type="checkbox"/> | ISPOR (models only) <input type="checkbox"/>                                                  |
| <b>Risk of bias [CHEC, ISPOR]:</b>                                       | High <input type="checkbox"/>          | Medium <input type="checkbox"/> Low <input type="checkbox"/> Unknown <input type="checkbox"/> |
| <b>Comments on study quality and limitations:</b>                        |                                        |                                                                                               |
