# Supplementary material for: Cost-effectiveness of enhanced recovery in hip and knee replacement: a systematic review protocol
Source: PubMed Central journal article supplement — BMJ Open. 2018 Mar 14;8(3):e019740. doi: 10.1136/bmjopen-2017-019740 (PMC5857701; doi:10.1136/bmjopen-2017-019740), 2018-03-14
Supplement: bmjopen-2017-019740supp003.pdf [file bmjopen-2017-019740supp003.pdf]

### SUPPLEMENTARY FILE 3: Risk of bias checklists

Table 3.1: Risk of bias checklist, adapted from Evers et al. 2005

|                                                                                                                 |
|-----------------------------------------------------------------------------------------------------------------|
| Is the study population clearly described?                                                                      |
| Are competing alternatives clearly described?                                                                   |
| Is a well-defined research question posed in answerable form?                                                   |
| Is the economic study design appropriate to the stated objective?                                               |
| Is the chosen time horizon appropriate in order to include relevant costs and consequences?                     |
| Is the actual perspective chosen appropriate?                                                                   |
| Are all important and relevant costs for each alternative identified?                                           |
| Are all costs measured appropriately in physical units?                                                         |
| Are costs valued appropriately?                                                                                 |
| Are all important and relevant outcomes for each alternative identified?                                        |
| Are all outcomes measured appropriately?                                                                        |
| Are outcomes valued appropriately?                                                                              |
| Is an incremental analysis of costs and outcomes of alternatives performed?                                     |
| Are all future costs and outcomes discounted appropriately?                                                     |
| Are all important variables, whose values are uncertain, appropriately subjected to sensitivity analysis?       |
| Do the conclusions follow from the data reported?                                                               |
| Does the study discuss the generalizability of the results to other settings and patient/client groups?         |
| Does the article indicate that there is no potential conflict of interest of study researcher(s) and funder(s)? |
| Are ethical and distributional issues discussed appropriately?                                                  |

## SUPPLEMENTARY FILE 3: Risk of bias checklists

Table 3.2: Risk of bias checklist, adapted from Caro et al. 2014

|                                                                                                  |
|--------------------------------------------------------------------------------------------------|
| <b>Relevance</b>                                                                                 |
| Is the population relevant?                                                                      |
| Are any critical interventions missing?                                                          |
| Are any relevant outcomes missing?                                                               |
| Is the context (settings and circumstances) applicable?                                          |
| <b>Credibility</b>                                                                               |
| <b>Validation</b>                                                                                |
| Is external validation of the model sufficient to make its results credible for your decision?   |
| Is internal verification of the model sufficient to make its results credible for your decision? |
| Does the model have sufficient face validity to make its results credible for your decision?     |
| <b>Design</b>                                                                                    |
| Is the design of the model adequate for your decision problem?                                   |
| <b>Data</b>                                                                                      |
| Are the data used in populating the model suitable for your decision problem?                    |
| <b>Analysis</b>                                                                                  |
| Were the analyses performed using the model adequate to inform your decision problem?            |
| Was there an adequate assessment of the effects of uncertainty?                                  |
| <b>Reporting</b>                                                                                 |
| Was the reporting of the model adequate to inform your decision problem?                         |
| <b>Interpretation</b>                                                                            |
| Was the interpretation of results fair and balanced?                                             |
| <b>Conflict of Interest</b>                                                                      |
| Were there any potential conflicts of interest?                                                  |
| If there were potential conflicts of interest, were steps taken to address these?                |
